# Supplementary material for: The β3-adrenergic receptor agonist mirabegron improves glucose homeostasis in obese humans
Source: JCI journal article supplement (doi:10.1172/jci134892), 2020-01-21
Supplement: sd1 [file 1]

**Table S1. Results from DEXA analysis.**

| <b>Region</b>            | <b>Mirabegron<sup>a</sup></b> |             | <b>P</b> |
|--------------------------|-------------------------------|-------------|----------|
|                          | <b>Pre</b>                    | <b>Post</b> |          |
| <b>Total tissue (kg)</b> | 84.9 ± 2.6                    | 84.3 ± 2.6  | 0.282    |
| <b>Total Fat (kg)</b>    | 39.5 ± 2.4                    | 38.9 ± 2.6  | 0.136    |
| <b>Total Lean (kg)</b>   | 45.5 ± 1.9                    | 45.4 ± 1.8  | 0.92     |
| <b>Total Bone (kg)</b>   | 2.5 ± 1                       | 2.5 ± 1     | 0.44     |

<sup>a</sup>Data are presented as mean ± SEM (n=13) and were analyzed by paired, two-tailed Student's t-tests. There were no significant changes in the leg, gynoid, trunk, or android regions in fat, lean, or bone mass.

**Table S2. Results from indirect calorimetry.**

| <b>Measure</b>                 | <b>Mirabegron<sup>a</sup></b> |               | <b>P-value</b> |
|--------------------------------|-------------------------------|---------------|----------------|
|                                | <b>Pre</b>                    | <b>Post</b>   |                |
| <b>VO<sub>2</sub> (L/min)</b>  | 0.221 ± 0.008                 | 0.221 ± 0.008 | 0.99           |
| <b>VCO<sub>2</sub> (L/min)</b> | 0.183 ± 0.009                 | 0.181 ± 0.008 | 0.66           |
| <b>RQ</b>                      | 0.827 ± 0.014                 | 0.819 ± 0.013 | 0.49           |
| <b>REE (kcal/day)</b>          | 1532 ± 61                     | 1538 ± 56     | 0.8            |

<sup>a</sup>Data are presented as mean ± SEM (n=13) and were analyzed by paired, two-tailed Student's t-tests.

**Table S3. Results from PET-CT scans.**

| <b>Measure</b>            | <b>Mirabegron<sup>a</sup></b> |             | <b>P-value</b> |
|---------------------------|-------------------------------|-------------|----------------|
|                           | <b>Pre</b>                    | <b>Post</b> |                |
| <b>SUV<sub>mean</sub></b> | 0.48 ± 0.21                   | 0.53 ± 0.23 | 0.53           |
| <b>SUV<sub>max</sub></b>  | 1.45 ± 0.74                   | 1.87 ± 1.02 | 0.55           |
| <b>SUV<sub>peak</sub></b> | 1.21 ± 0.62                   | 1.35 ± 0.7  | 0.77           |
| <b>Glycolysis</b>         | 80 ± 51                       | 108 ± 67    | 0.71           |

<sup>a</sup>Standardized uptake value (SUV) and glycolysis data are presented as mean ± SEM and were analyzed by paired, two-tailed Student's t-tests (n=12).

**Table S4. Measurements of systemic inflammation and adipokines.**

| <b>Marker</b>                          | <b>Mirabegron<sup>a</sup></b> |                 | <b>P-value</b> |
|----------------------------------------|-------------------------------|-----------------|----------------|
|                                        | <b>Pre</b>                    | <b>Post</b>     |                |
| <b>TNF<math>\alpha</math> (pg /ml)</b> | 3.00 $\pm$ 0.23               | 2.93 $\pm$ 0.20 | 0.48           |
| <b>MCP1 (pg /ml)</b>                   | 138 $\pm$ 5                   | 138 $\pm$ 6     | 0.98           |
| <b>Adiponectin (ug /ml)</b>            | 6.09 $\pm$ 0.65               | 6.13 $\pm$ 0.53 | 0.90           |
| <b>HMW Adiponectin (ug / ml)</b>       | 2.53 $\pm$ 0.37               | 2.49 $\pm$ 0.36 | 0.66           |
| <b>Resistin (pg /ml)</b>               | 1518 $\pm$ 35                 | 1492 $\pm$ 33   | 0.49           |
| <b>FGF21</b>                           | 1299 $\pm$ 60                 | 1578 $\pm$ 83   | 0.25           |
| <b>Adipsin (ng/ ml)</b>                | 2300 $\pm$ 34                 | 2393 $\pm$ 29   | 0.23           |
| <b>Leptin (ng/ ml)</b>                 | 52 $\pm$ 2                    | 52 $\pm$ 3      | 0.85           |

<sup>a</sup>Data are presented as mean  $\pm$  SEM (n=12) and were analyzed by paired, two-tailed Student's t-tests.

**Table S6. Primer sequences.**

| Gene symbol  | Forward                    | Reverse                     |
|--------------|----------------------------|-----------------------------|
| <i>ACTB</i>  | GAGCACAGAGCCTCGCCTTT       | CGCGGCGATATCATCATCCAT       |
| <i>COXIV</i> | AGC CAG AAG GCA CTG AAG GA | AGC CCC TGT TCA TCT CAG CA  |
| <i>PGC1A</i> | TCC TTC CTC CAT GCC TGA CG | TTA GCT GAG TGT TGG CTG GTG |
| <i>PLIN5</i> | TGT CTG AAG CCG CTC GC     | ACA CTG GAT CTG GGG ATC TGA |
| <i>PPIA</i>  | CCCACCGTGTTCTTCGACAT       | GCTGTCTTTGGGACCTTGTCT       |
| <i>PPIB</i>  | AAGTCACCGTCAAGGTGTATTTT    | TGCTGTTTTTGTAGCCAAATCCT     |
| <i>TBP</i>   | CCCGAAACGCCGAATATAATCC     | AATCAGTGCCGTGGTTCGTG        |
| <i>TFAM</i>  | GTT TCT CCG AAG CAT GTG GG | GAC AGA TGA AAA CCA CCT CGG |
| <i>TUBB</i>  | ACCAACCTACGGGGATCTGAA      | TTGACTGCCAACTTGCGGA         |
| <i>UBC9</i>  | CTGGAAGATGGTCGTACCCTG      | GGTCTTGCCAGTGAGTGTCT        |

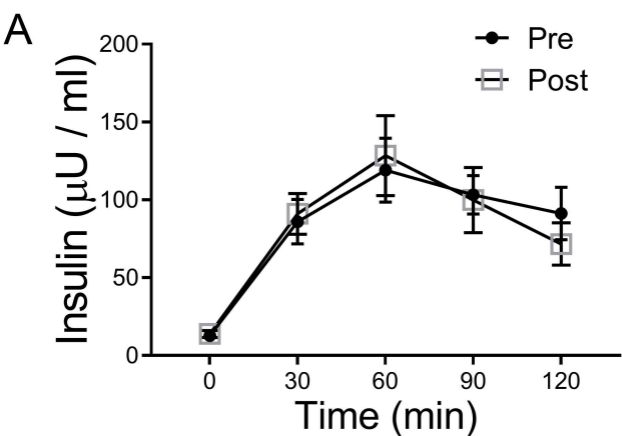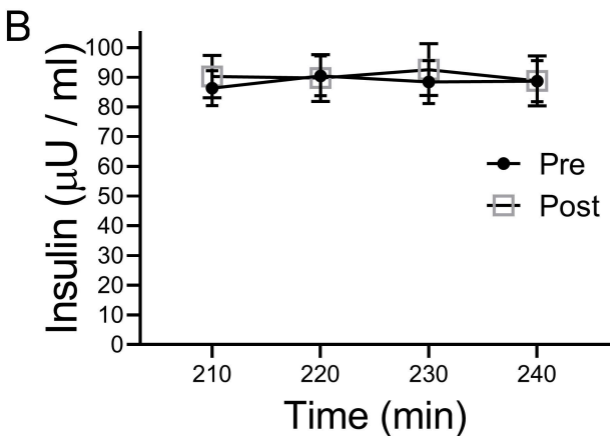

**Figure S1. Insulin levels during the OGTT and euglycemic clamp.** A) Insulin levels are shown during the OGTT. B) Insulin levels are shown during the final 30 min of insulin infusion during the the euglycemic clamp. Data are presented as mean  $\pm$  SEM.

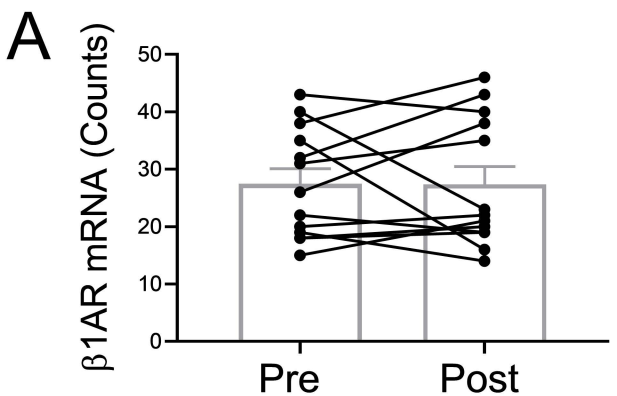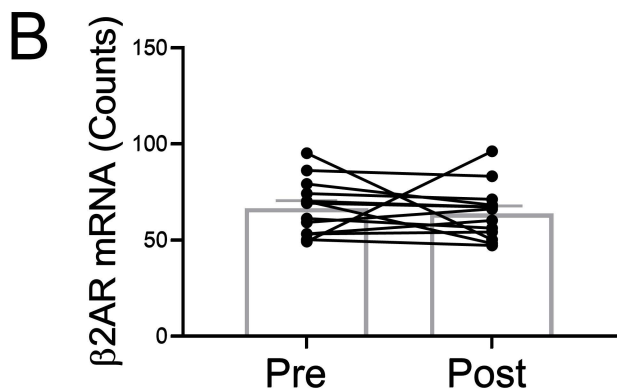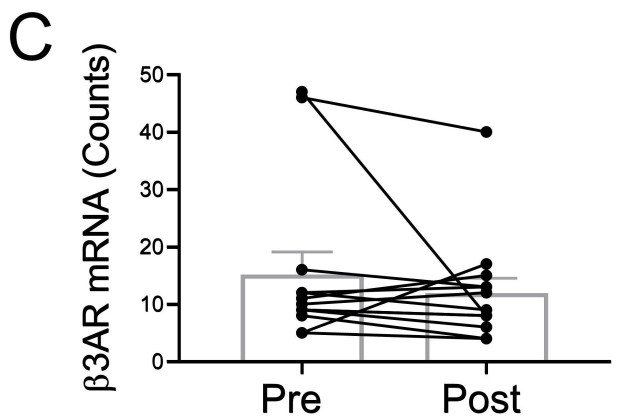

**Figure S2.  $\beta$ AR mRNA expression before and after mirabegron treatment.** A-C) the mRNA expression of the indicated  $\beta$ AR was determined using the nanostring nCounter system as described in "Methods." Data are presented as mean  $\pm$  SEM.
